# Supplementary material
Source: bioRxiv or medRxiv preprint supplement (https://www.medrxiv.org/highwire/filestream/76716/field_highwire_adjunct_files/6/2020.04.16.20057513-7.pdf)
Supplement: Supplementary file [file 2020.04.16.20057513-7.pdf]

**Supplementary Table 2****2a. Hosmer and Lemeshow goodness of fit groups, external validation cohort 1**

| PRAIS2 categories   | Predicted survival | Predicted mortality | Observed survival | Observed mortality |
|---------------------|--------------------|---------------------|-------------------|--------------------|
| [3.61e-05,0.000927] | 132.9388           | 0.06122354          | 133               | 0                  |
| [0.000927,0.00249]  | 132.7736           | 0.22635598          | 132               | 1                  |
| [0.00249,0.00482]   | 132.5155           | 0.48445930          | 133               | 0                  |
| [0.00482,0.00802]   | 132.1368           | 0.86323928          | 131               | 2                  |
| [0.00802,0.0115]    | 131.7083           | 1.29173262          | 130               | 3                  |
| [0.0115,0.0164]     | 131.1824           | 1.81763537          | 131               | 2                  |
| [0.0164,0.0222]     | 130.4860           | 2.51397487          | 131               | 2                  |
| [0.0222,0.0308]     | 129.5187           | 3.48125996          | 126               | 7                  |
| [0.0308,0.0463]     | 128.0397           | 4.96026202          | 125               | 8                  |
| [0.0463,0.256]      | 121.2271           | 11.77293767         | 127               | 6                  |

## 2b. Hosmer and Lemeshow goodness of fit groups, external validation cohort 2

| PRAIS2 categories  | Predicted survival | Predicted mortality | Observed survival | Observed mortality |
|--------------------|--------------------|---------------------|-------------------|--------------------|
| [0.000131,0.00125] | 118.9273           | 0.07268051          | 119               | 0                  |
| [0.00125,0.00273]  | 118.7637           | 0.23632366          | 119               | 0                  |
| [0.00273,0.00493]  | 117.5494           | 0.45061926          | 118               | 0                  |
| [0.00493,0.00709]  | 118.2901           | 0.70991743          | 119               | 0                  |
| [0.00709,0.0101]   | 117.9783           | 1.02166557          | 118               | 1                  |
| [0.0101,0.0145]    | 116.6018           | 1.39819713          | 117               | 1                  |
| [0.0145,0.0206]    | 116.9503           | 2.04966950          | 119               | 0                  |
| [0.0206,0.0339]    | 114.7955           | 3.20445956          | 113               | 5                  |
| [0.0339,0.0743]    | 113.0781           | 5.92186013          | 116               | 3                  |
| [0.0743,0.408]     | 101.4640           | 17.53604435         | 106               | 13                 |

**2c. Hosmer and Lemeshow goodness of fit groups, overlapping cohorts**

| PRAIS2 categories   | Predicted survival | Predicted mortality | Observed survival | Observed mortality |
|---------------------|--------------------|---------------------|-------------------|--------------------|
| [4.29e-05,0.000909] | 179.9167           | 0.08334853          | 180               | 0                  |
| (0.000909,0.00231]  | 178.7233           | 0.27665267          | 179               | 0                  |
| (0.00231,0.00444]   | 178.4120           | 0.58804885          | 176               | 3                  |
| (0.00444,0.00751]   | 178.9427           | 1.05730682          | 178               | 2                  |
| (0.00751,0.0108]    | 177.3823           | 1.61770441          | 178               | 1                  |
| (0.0108,0.016]      | 176.6366           | 2.36336224          | 175               | 4                  |
| (0.016,0.0231]      | 176.4888           | 3.51120063          | 179               | 1                  |
| (0.0231,0.0332]     | 174.0463           | 4.95370602          | 173               | 6                  |
| (0.0332,0.0548]     | 171.6407           | 7.35925742          | 168               | 11                 |
| (0.0548,0.351]      | 161.5016           | 18.49839298         | 152               | 28                 |

**2d. Hosmer and Lemeshow goodness of fit groups, in non-elective subset**

| PRAIS2 categories | Predicted survival | Predicted mortality | Observed survival | Observed mortality |
|-------------------|--------------------|---------------------|-------------------|--------------------|
| [0.00109,0.00594] | 48.81584           | 0.1841625           | 49                | 0                  |
| [0.00594,0.00946] | 47.64347           | 0.3565252           | 48                | 0                  |
| [0.00946,0.0138]  | 47.45516           | 0.5448356           | 47                | 1                  |
| [0.0138,0.0201]   | 47.19803           | 0.8019745           | 48                | 0                  |
| [0.0201,0.0286]   | 46.82881           | 1.1711897           | 46                | 2                  |
| [0.0286,0.0382]   | 46.45216           | 1.5478412           | 44                | 4                  |
| [0.0382,0.0542]   | 45.84400           | 2.1560041           | 46                | 2                  |
| [0.0542,0.0818]   | 44.74003           | 3.2599674           | 47                | 1                  |
| [0.0818,0.126]    | 43.06033           | 4.9396731           | 46                | 2                  |
| [0.126,0.408]     | 38.43469           | 10.5653107          | 39                | 10                 |
